# Supplementary material for: Eco-friendly nanostructured Zn–Al layered double hydroxide photocatalysts with enhanced photocatalytic activity
Source: Royal Society of Chemistry journal article supplement (doi:10.1039/c9ce00530g), 2019-01-01
Supplement: c9ce00530g1.pdf [file c9ce00530g1.pdf]

# Supplementary Information

## Eco-friendly nanostructured photocatalysts of Zn-Al layered double hydroxides with enhanced photocatalytic activity

Zhe Zhang, Zhong Hua, Jihui Lang\*, Yuxin Song, Qi Zhang, Qiang Han, Hougang Fan, Ming Gao, Xiuyan Li, Jinghai Yang

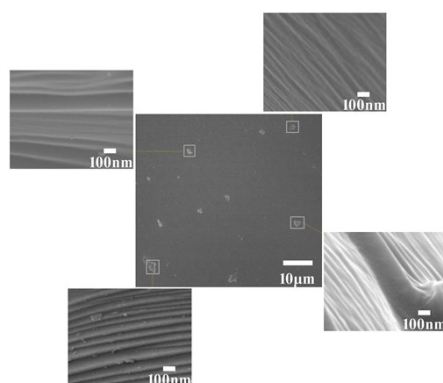

Fig.1 SEM images of the Zn-Al-LDH-9 sample for different positions.

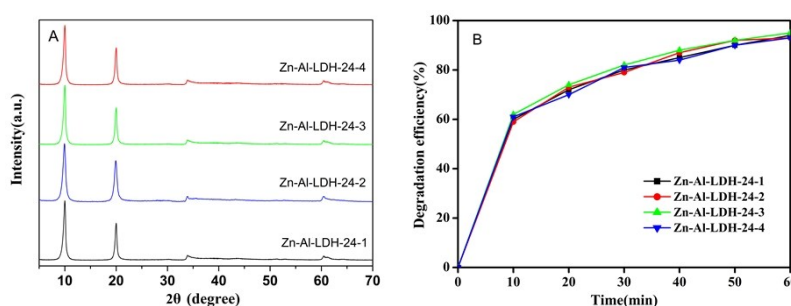

Fig.2 XRD (A) and photocatalytic results (B) of Zn-Al-LDH-24 samples prepared by four repeatability experiments.
